# Supplementary material for: Fabrication of Gelatin-ZnO Nanofibers for Antibacterial Applications
Source: PubMed Central journal article supplement (PMC7795140; doi:10.3390/ma14010103), 2020-12-29
Supplement: materials-14-00103-s001.pdf [file materials-14-00103-s001.pdf]

Supporting Information

# Fabrication of Gelatin-ZnO Nanofibers for Antibacterial Applications

Nataliya Babayevska, Łucja Przysiecka, Grzegorz Nowaczyk, Marcin Jarek, Martin Järvekülg, Triin Kangur, Ewa Janiszewska, Stefan Jurga and Igor Iatsunskyi

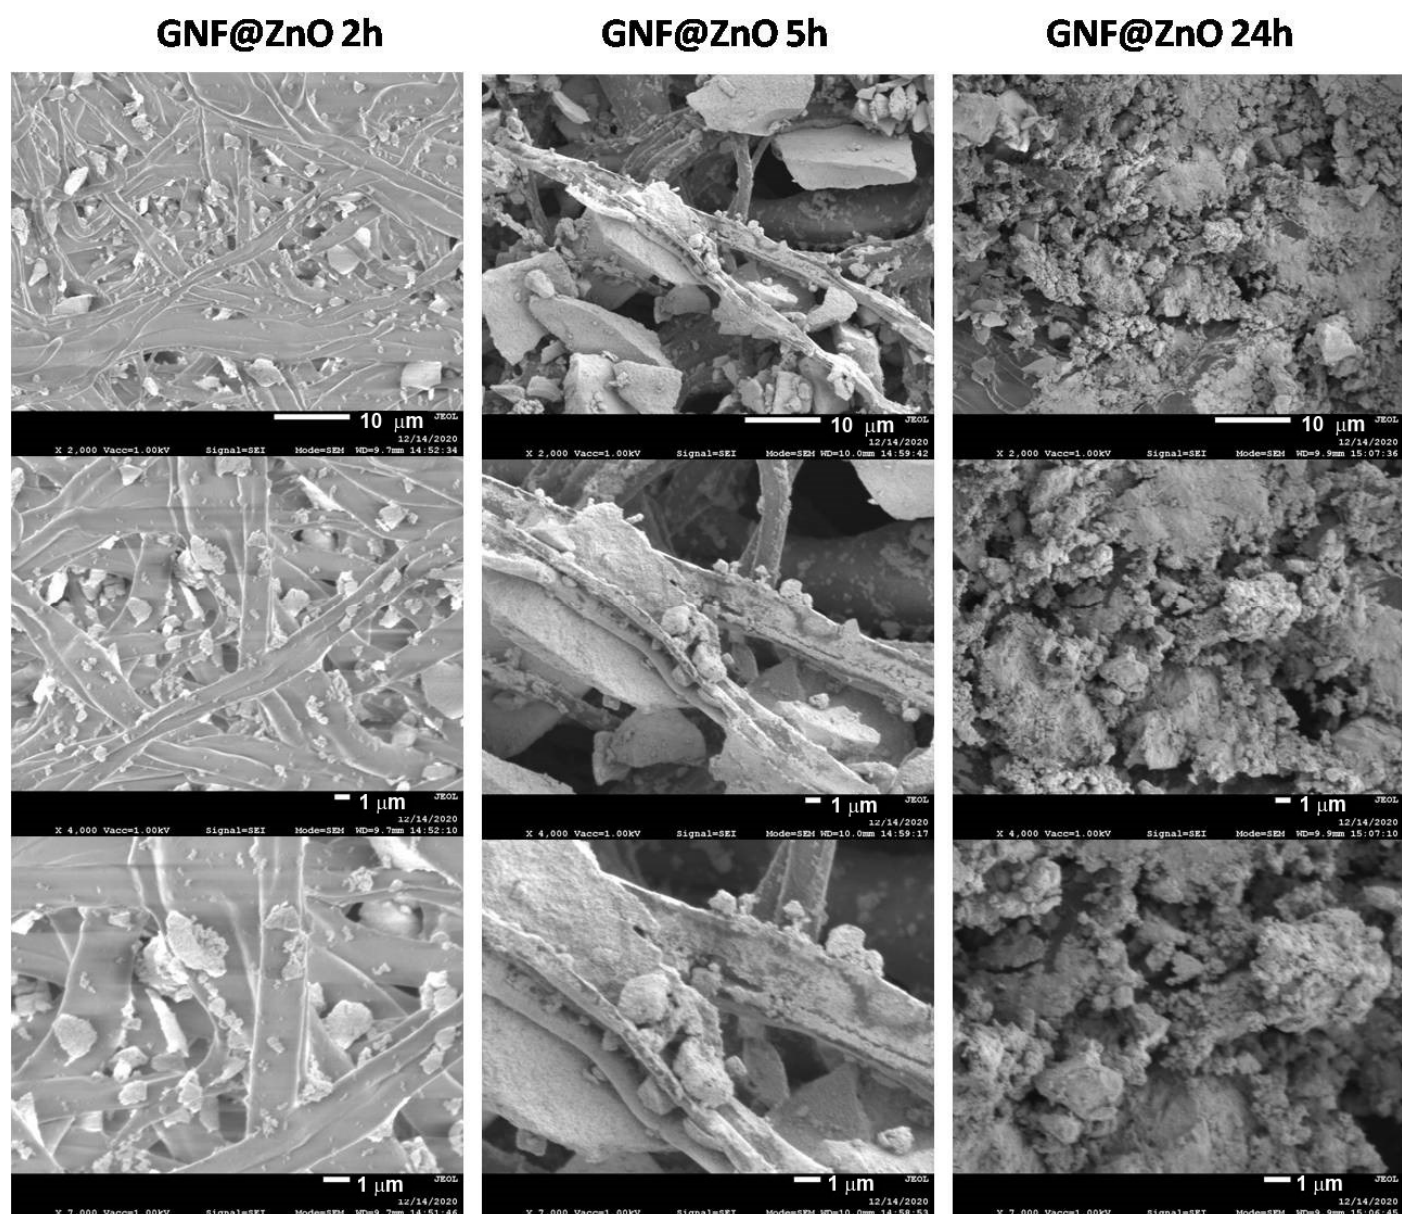

Figure S1. SEM images (magnification  $\times 2000$ ,  $\times 4000$  and  $\times 7000$ ) of GNF@ZnO 2h, GNF@ZnO 5h and GNF@ZnO 24h.

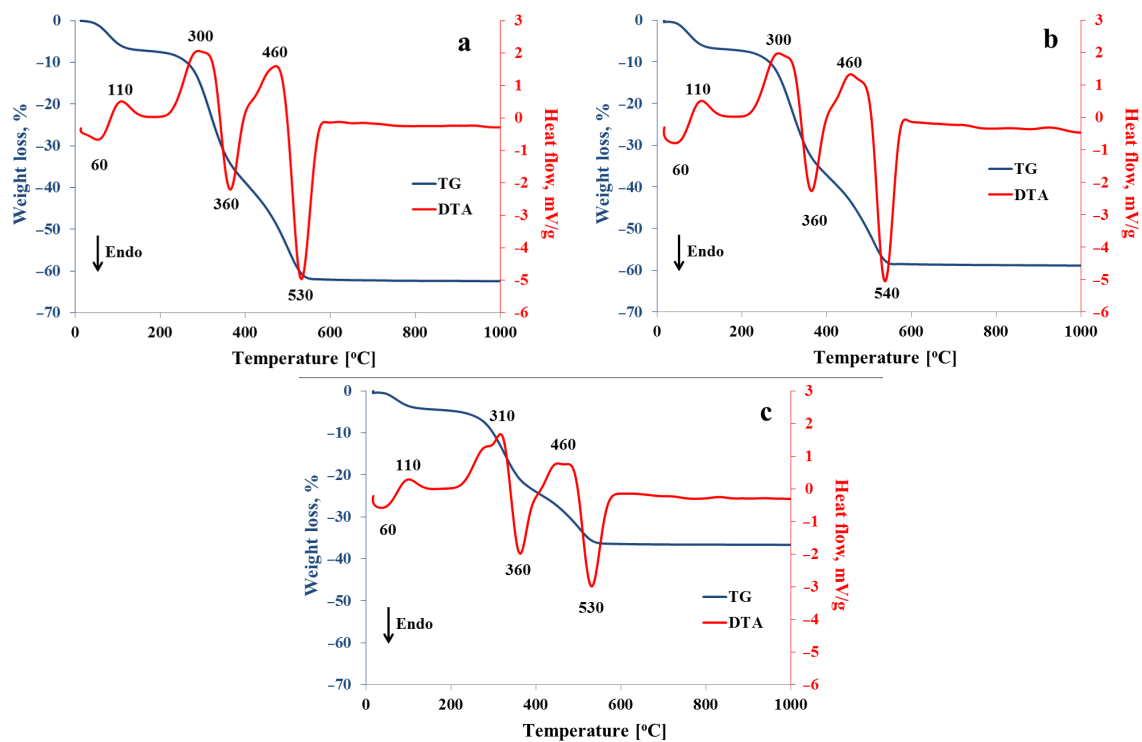

Figure S2. TG-DTA curves of GNF@ZnO 2h (a), GNF@ZnO 5h (b) and GNF@ZnO 24h (c).
